# Supplementary material for: The planarian nanos-like gene Smednos is expressed in germline and eye precursor cells during development and regeneration
Source: Springer Nature journal article supplement (doi:10.1007/s00427-007-0146-3), 2007-03-27
Supplement: MOESM3 [file 427_2007_146_MOESM3_ESM.doc]

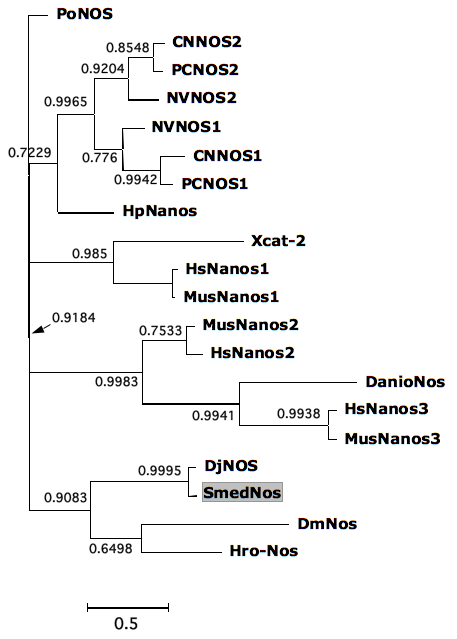


**S3** Phylogenetic tree obtained by **Bayesian inference** analysis of the amino acid sequences corresponding to the zinc-finger motifs and flanking regions of representatives of the Nanos family shown in S2. Branch lengths are proportional to numbers of substitutions per site indicated by the scale. Nanos from sponge, PoNOS, was used as the outgroup. SmedNos (highlighted in grey) forms a monophyletic group with Nanos from the protostomes, including Platyhelmintes (DjNOS), Arthropoda (DmNos) and Annelida (Hro-Nos). Accession numbers are indicated in S2.
